# Supplementary material for: Development and Validation of a Novel Prognostic Model for Lower-Grade Glioma Based on Enhancer RNA-Regulated Prognostic Genes
Source: Front Oncol. 2022 Mar 1;12:714338. doi: 10.3389/fonc.2022.714338 (PMC8921558; doi:10.3389/fonc.2022.714338)
Supplement: Supplementary Table 6 — The GSEA results in the positive correlative group. [file Table_6.xlsx]

## Sheet: Sheet2
Gene	number	KEGG pathway	adjusted p
ARL3	1	KEGG_RIBOSOME	< 0.001
CDKN2C	1	KEGG_N_GLYCAN_BIOSYNTHESIS	< 0.001
	2	KEGG_P53_SIGNALING_PATHWAY	< 0.001
	3	KEGG_PROTEASOME	< 0.001
	4	KEGG_SMALL_CELL_LUNG_CANCER	< 0.001
	5	KEGG_SPLICEOSOME	< 0.001
CUEDC2	1	KEGG_OXIDATIVE_PHOSPHORYLATION	< 0.001
	2	KEGG_PARKINSONS_DISEASE	< 0.001
	3	KEGG_PROTEASOME	< 0.001
	4	KEGG_RNA_POLYMERASE	0.003
	5	KEGG_TERPENOID_BACKBONE_BIOSYNTHESIS	0.022
EIF2AK4	1	KEGG_CELL_CYCLE	< 0.001
	2	KEGG_DNA_REPLICATION	0.018
	3	KEGG_HOMOLOGOUS_RECOMBINATION	0.046
	4	KEGG_NUCLEOTIDE_EXCISION_REPAIR	0.026
	5	KEGG_UBIQUITIN_MEDIATED_PROTEOLYSIS	< 0.001
GNG12	1	KEGG_B_CELL_RECEPTOR_SIGNALING_PATHWAY	< 0.001
	2	KEGG_ECM_RECEPTOR_INTERACTION	< 0.001
	3	KEGG_MISMATCH_REPAIR	0.028
	4	KEGG_NATURAL_KILLER_CELL_MEDIATED_CYTOTOXICITY	< 0.001
	5	KEGG_TOLL_LIKE_RECEPTOR_SIGNALING_PATHWAY	< 0.001
NRG3	1	KEGG_ALANINE_ASPARTATE_AND_GLUTAMATE_METABOLISM	0.011
	2	KEGG_BUTANOATE_METABOLISM	0.007
	3	KEGG_CALCIUM_SIGNALING_PATHWAY	< 0.001
	4	KEGG_OLFACTORY_TRANSDUCTION	< 0.001
	5	KEGG_PHOSPHATIDYLINOSITOL_SIGNALING_SYSTEM	< 0.001
PPM1L	1	KEGG_BIOSYNTHESIS_OF_UNSATURATED_FATTY_ACIDS	0.028
RGR	1	KEGG_RIBOSOME	< 0.001
	2	KEGG_TERPENOID_BACKBONE_BIOSYNTHESIS	0.043
RYR3	1	KEGG_AUTOIMMUNE_THYROID_DISEASE	0.004
	2	KEGG_ECM_RECEPTOR_INTERACTION	< 0.001
	3	KEGG_NICOTINATE_AND_NICOTINAMIDE_METABOLISM	0.048
	4	KEGG_PRIMARY_IMMUNODEFICIENCY	0.014
	5	KEGG_STARCH_AND_SUCROSE_METABOLISM	0.041
SEMA4G	1	KEGG_RIBOSOME	< 0.001
TBPL1	1	KEGG_RIBOSOME	< 0.001
USP28	1	KEGG_BASAL_TRANSCRIPTION_FACTORS	0.001
	2	KEGG_BASE_EXCISION_REPAIR	0.033
	3	KEGG_CELL_CYCLE	< 0.001
	4	KEGG_NUCLEOTIDE_EXCISION_REPAIR	0.003
	5	KEGG_SPLICEOSOME	< 0.001
ZSCAN20	1	KEGG_CELL_CYCLE	< 0.001
	2	KEGG_NOTCH_SIGNALING_PATHWAY	0.015
	3	KEGG_PANCREATIC_CANCER	< 0.001
	4	KEGG_RNA_DEGRADATION	0.002
	5	KEGG_SMALL_CELL_LUNG_CANCER	< 0.001
